# Supplementary material for: Encompassing receptor flexibility in virtual screening using ensemble docking-based hybrid QSAR: discovery of novel phytochemicals for BACE1 inhibition
Source: Royal Society of Chemistry journal article supplement (doi:10.1039/c4mb00307a), 2014-07-09
Supplement: c4mb00307a3.pdf [file c4mb00307a3.pdf]

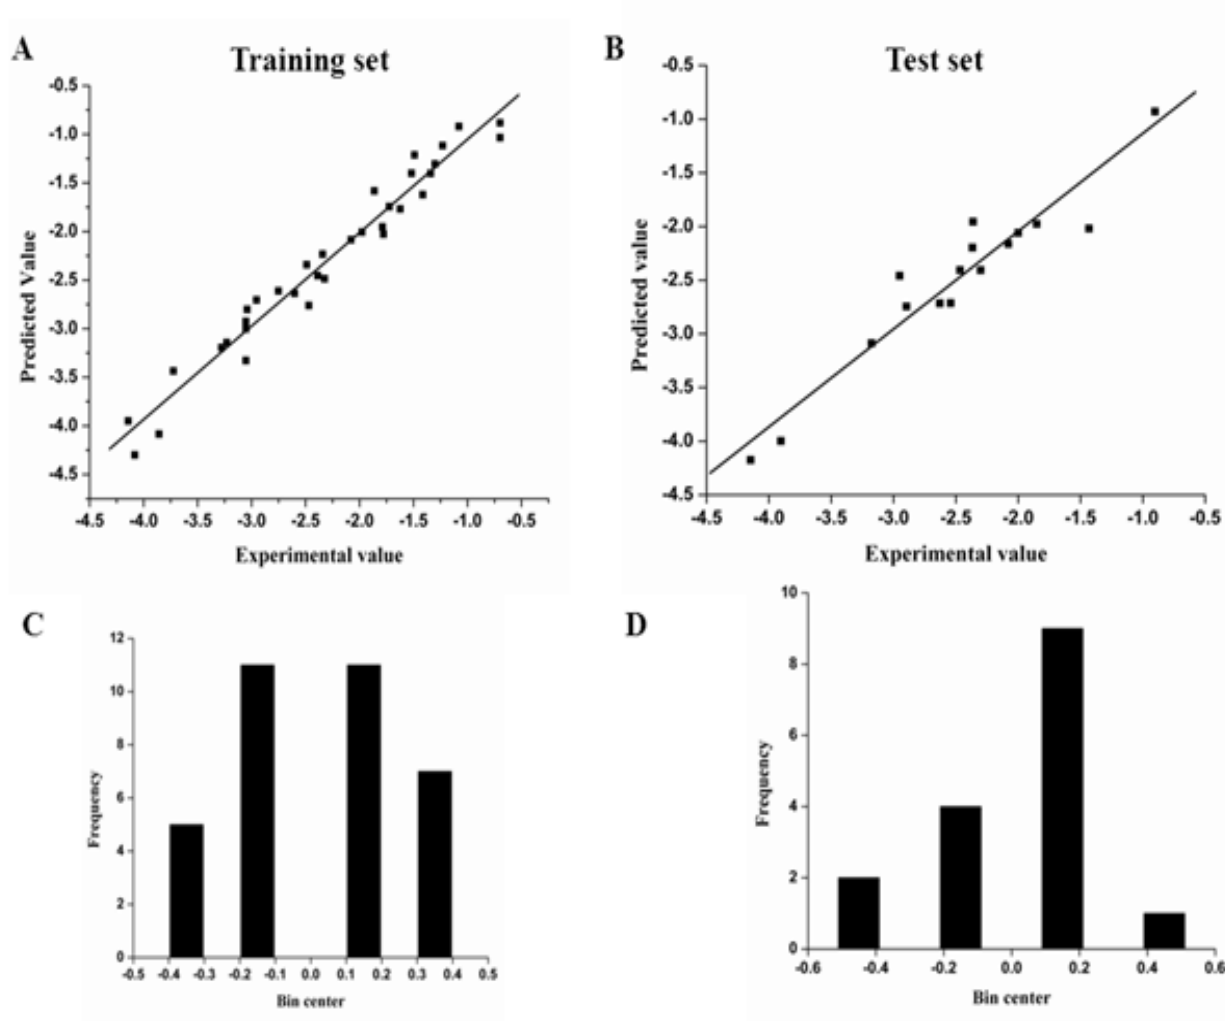

**Figure S1:** Correlation between predicted and experimental biological activity obtained by using the final structure-activity model for training (A) and test (B) set compounds. Residual histogram frequency statistics are shown for training (C) and test (D) set compounds.

**A: Training set**

**Residual Diagnostics**

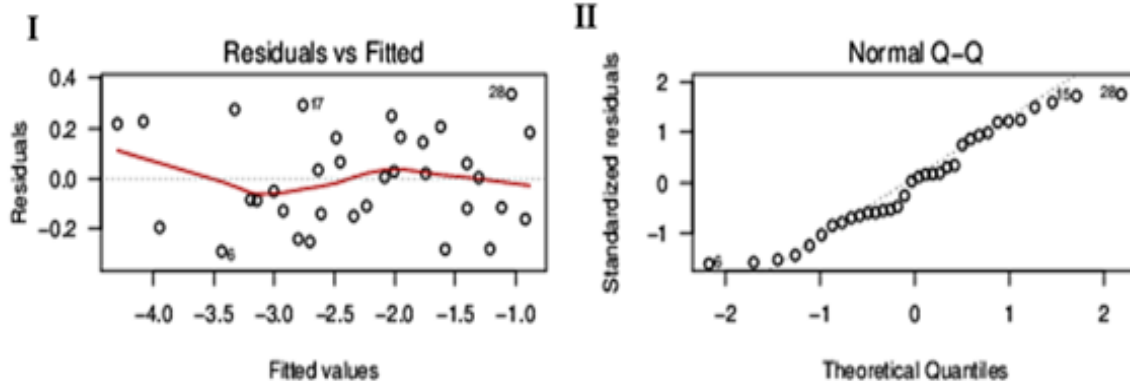

**B: Test set**

**Residual Diagnostics**

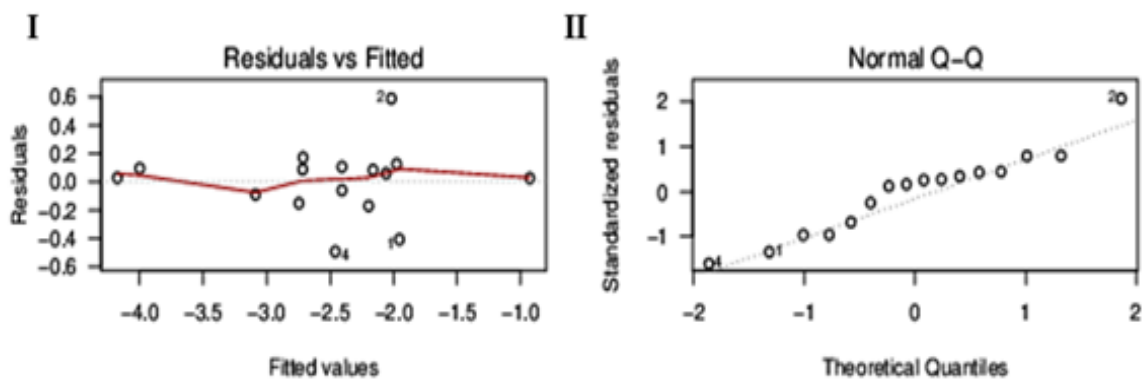

**Figure SII:** Identification of “domain of applicability” of the designed hybrid structure-activity model for (A) training set (B) test set. **I:** Residual vs Fitted values plot; **II:** Q-Q plot.
